# Supplementary material for: Application of Improved BQGA in Robot Kinematics Inverse Solution
Source: Hindawi journal article supplement (doi:10.1155/2019/1659180), 2019-02-03
Supplement: f1 [file 1659180.f1.docx]

% 改进前后的比较程序 命名为：GHBJ.m

%(1)压缩空间（2）梯度和代数决定染色体的更新（3）代数确定变异概率（4）防退化机制完备

clear all;

close all;

Size=100;

CodeL=6;

MinX(1)=-8/9*pi;

MaxX(1)=8/9*pi;

MinX(2)=-5/4*pi;

MaxX(2)=1/4*pi;

MinX(3)=-1/4*pi;

MaxX(3)=5/4*pi;

MinX(4)=-11/18*pi;

MaxX(4)=17/18*pi;

MinX(5)=-5/9*pi;

MaxX(5)=5/9*pi;

MinX(6)=-133/90*pi;

MaxX(6)=133/90*pi;

%初始化开始

fai(:,1)=3/2*pi*rand(Size,1)-1/2*pi*rand(Size,1);

sita(:,1)=pi*rand(Size,1);

fai(:,2)=3/2*pi*rand(Size,1)-1/2*pi*rand(Size,1);

sita(:,2)=pi*rand(Size,1);

fai(:,3)=3/2*pi*rand(Size,1)-1/2*pi*rand(Size,1);

sita(:,3)=pi*rand(Size,1);

fai(:,4)=3/2*pi*rand(Size,1)-1/2*pi*rand(Size,1);

sita(:,4)=pi*rand(Size,1);

fai(:,5)=3/2*pi*rand(Size,1)-1/2*pi*rand(Size,1);

sita(:,5)=pi*rand(Size,1);

fai(:,6)=3/2*pi*rand(Size,1)-1/2*pi*rand(Size,1);

sita(:,6)=pi*rand(Size,1);

oldfai(:,1)=3/2*pi*rand(Size,1)-1/2*pi*rand(Size,1);

oldsita(:,1)=pi*rand(Size,1);

oldfai(:,2)=3/2*pi*rand(Size,1)-1/2*pi*rand(Size,1);

oldsita(:,2)=pi*rand(Size,1);

oldfai(:,3)=3/2*pi*rand(Size,1)-1/2*pi*rand(Size,1);

oldsita(:,3)=pi*rand(Size,1);

oldfai(:,4)=3/2*pi*rand(Size,1)-1/2*pi*rand(Size,1);

oldsita(:,4)=pi*rand(Size,1);

oldfai(:,5)=3/2*pi*rand(Size,1)-1/2*pi*rand(Size,1);

oldsita(:,5)=pi*rand(Size,1);

oldfai(:,6)=3/2*pi*rand(Size,1)-1/2*pi*rand(Size,1);

oldsita(:,6)=pi*rand(Size,1);

p(:,1,1)=cos(fai(:,1)).*sin(sita(:,1));

p(:,1,2)=sin(fai(:,1)).*sin(sita(:,1));

p(:,1,3)=cos(sita(:,1));

p(:,2,1)=cos(fai(:,2)).*sin(sita(:,2));

p(:,2,2)=sin(fai(:,2)).*sin(sita(:,2));

p(:,2,3)=cos(sita(:,2));

p(:,3,1)=cos(fai(:,3)).*sin(sita(:,3));

p(:,3,2)=sin(fai(:,3)).*sin(sita(:,3));

p(:,3,3)=cos(sita(:,3));

p(:,4,1)=cos(fai(:,4)).*sin(sita(:,4));

p(:,4,2)=sin(fai(:,4)).*sin(sita(:,4));

p(:,4,3)=cos(sita(:,4));

p(:,5,1)=cos(fai(:,5)).*sin(sita(:,5));

p(:,5,2)=sin(fai(:,5)).*sin(sita(:,5));

p(:,5,3)=cos(sita(:,5));

p(:,6,1)=cos(fai(:,6)).*sin(sita(:,6));

p(:,6,2)=sin(fai(:,6)).*sin(sita(:,6));

p(:,6,3)=cos(sita(:,6));

oldp(:,1,1)=cos(oldfai(:,1)).*sin(oldsita(:,1));

oldp(:,1,2)=sin(oldfai(:,1)).*sin(oldsita(:,1));

oldp(:,1,3)=cos(oldsita(:,1));

oldp(:,2,1)=cos(oldfai(:,2)).*sin(oldsita(:,2));

oldp(:,2,2)=sin(oldfai(:,2)).*sin(oldsita(:,2));

oldp(:,2,3)=cos(oldsita(:,2));

oldp(:,3,1)=cos(oldfai(:,3)).*sin(oldsita(:,3));

oldp(:,3,2)=sin(oldfai(:,3)).*sin(oldsita(:,3));

oldp(:,3,3)=cos(oldsita(:,3));

oldp(:,4,1)=cos(oldfai(:,4)).*sin(oldsita(:,4));

oldp(:,4,2)=sin(oldfai(:,4)).*sin(oldsita(:,4));

oldp(:,4,3)=cos(oldsita(:,4));

oldp(:,5,1)=cos(oldfai(:,5)).*sin(oldsita(:,5));

oldp(:,5,2)=sin(oldfai(:,5)).*sin(oldsita(:,5));

oldp(:,5,3)=cos(oldsita(:,5));

oldp(:,6,1)=cos(oldfai(:,6)).*sin(oldsita(:,6));

oldp(:,6,2)=sin(oldfai(:,6)).*sin(oldsita(:,6));

oldp(:,6,3)=cos(oldsita(:,6));

pm0=0.1;%设置变异概率初始值 pm放在主循环中了，随迭代次数变化 Pm=ones(1,Size)*pm0*(G-kg)/G;

G=1000;%设置代数

%解空间开始变换

x(:,1,:)=0.5*(MaxX(1)*(1+p(:,1,:))+MinX(1)*(1-p(:,1,:)));

x(:,2,:)=0.5*(MaxX(2)*(1+p(:,2,:))+MinX(2)*(1-p(:,2,:)));

x(:,3,:)=0.5*(MaxX(3)*(1+p(:,3,:))+MinX(3)*(1-p(:,3,:)));

x(:,4,:)=0.5*(MaxX(4)*(1+p(:,4,:))+MinX(4)*(1-p(:,4,:)));

x(:,5,:)=0.5*(MaxX(5)*(1+p(:,5,:))+MinX(5)*(1-p(:,5,:)));

x(:,6,:)=0.5*(MaxX(6)*(1+p(:,6,:))+MinX(6)*(1-p(:,6,:)));

oldx(:,1,:)=0.5*(MaxX(1)*(1+oldp(:,1,:))+MinX(1)*(1-oldp(:,1,:)));

oldx(:,2,:)=0.5*(MaxX(2)*(1+oldp(:,2,:))+MinX(2)*(1-oldp(:,2,:)));

oldx(:,3,:)=0.5*(MaxX(3)*(1+oldp(:,3,:))+MinX(3)*(1-oldp(:,3,:)));

oldx(:,4,:)=0.5*(MaxX(4)*(1+oldp(:,4,:))+MinX(4)*(1-oldp(:,4,:)));

oldx(:,5,:)=0.5*(MaxX(5)*(1+oldp(:,5,:))+MinX(5)*(1-oldp(:,5,:)));

oldx(:,6,:)=0.5*(MaxX(6)*(1+oldp(:,6,:))+MinX(6)*(1-oldp(:,6,:)));

%计算函数值开始

for i=1:1:Size

x11=x(i,1,1);x12=x(i,2,1);x13=x(i,3,1);x14=x(i,4,1);x15=x(i,5,1);x16=x(i,6,1);

x21=x(i,1,2);x22=x(i,2,2);x23=x(i,3,2);x24=x(i,4,2);x25=x(i,5,2);x26=x(i,6,2);

x31=x(i,1,3);x32=x(i,2,3);x33=x(i,3,3);x34=x(i,4,3);x35=x(i,5,3);x36=x(i,6,3);

%三条链代表的三个解代入表达式

%T为机械手臂的目标位置矩阵

T=[0.5322 -0.1137 -0.8390 0.0833;-0.4697 -0.8641 -0.1809 0.1890;-0.7044 0.4903 -0.5133 -0.4925;0 0 0 1];

%用每条链的6个角度值求出当前位置矩阵（此处表达式较为复杂，细心编入）

%F为当前位置矩阵与目标位置矩阵的二范数（即当前位置与目标位置的距离）

r111=cos(x11)*[cos(x12+x13)*(cos(x14)*cos(x15)*cos(x16)-sin(x14)*sin(x16))-sin(x12+x13)*sin(x15)*cos(x16)]+sin(x11)*(sin(x14)*cos(x15)*cos(x16)+cos(x14)*sin(x16));

r121=cos(x11)*[-cos(x12+x13)*(cos(x14)*cos(x15)*sin(x16)+sin(x14)*cos(x16))+sin(x12+x13)*sin(x15)*sin(x16)]+sin(x11)*(-sin(x14)*cos(x15)*sin(x16)+cos(x14)*cos(x16));

r131=-cos(x11)*(cos(x12+x13)*cos(x14)*sin(x15)+sin(x12+x13)*cos(x15))-sin(x11)*sin(x14)*sin(x15);

r141=cos(x11)*[0.02032*cos(x12+x13)-0.43307*sin(x12+x13)+0.4318*cos(x12)]-0.14909*sin(x11);

r211=sin(x11)*[cos(x12+x13)*(cos(x14)*cos(x15)*cos(x16)-sin(x14)*sin(x16))-sin(x12+x13)*sin(x15)*cos(x16)]-cos(x11)*(sin(x14)*cos(x15)*cos(x16)+cos(x14)*sin(x16));

r221=sin(x11)*[-cos(x12+x13)*(cos(x14)*cos(x15)*sin(x16)+sin(x14)*cos(x16))+sin(x12+x13)*sin(x15)*sin(x16)]-cos(x11)*(-sin(x14)*cos(x15)*sin(x16)+cos(x14)*cos(x16));

r231=-sin(x11)*(cos(x12+x13)*cos(x14)*sin(x15)+sin(x12+x13)*cos(x15))+cos(x11)*sin(x14)*sin(x15);

r241=sin(x11)*[0.02032*cos(x12+x13)-0.43307*sin(x12+x13)+0.4318*cos(x12)]+0.14909*cos(x11);

r311=-sin(x12+x13)*(cos(x14)*cos(x15)*cos(x16)-sin(x14)*sin(x16))-cos(x12+x13)*sin(x15)*cos(x16);

r321=sin(x12+x13)*(cos(x14)*cos(x15)*sin(x16)+sin(x14)*cos(x16))+cos(x12+x13)*sin(x15)*sin(x16);

r331=sin(x12+x13)*cos(x14)*sin(x15)-cos(x12+x13)*cos(x15);

r341=-0.02032*sin(x12+x13)-0.43307*cos(x12+x13)-0.4318*sin(x12);

r411=0;

r421=0;

r431=0;

r441=1;

A1=[r111 r121 r131 r141;r211 r221 r231 r241;r311 r321 r331 r341;r411 r421 r431 r441];

F(i,1)=norm((A1-T));

r112=cos(x21)*[cos(x22+x23)*(cos(x24)*cos(x25)*cos(x26)-sin(x24)*sin(x26))-sin(x22+x23)*sin(x25)*cos(x26)]+sin(x21)*(sin(x24)*cos(x25)*cos(x26)+cos(x24)*sin(x26));

r122=cos(x21)*[-cos(x22+x23)*(cos(x24)*cos(x25)*sin(x26)+sin(x24)*cos(x26))+sin(x22+x23)*sin(x25)*sin(x26)]+sin(x21)*(-sin(x24)*cos(x25)*sin(x26)+cos(x24)*cos(x26));

r132=-cos(x21)*(cos(x22+x23)*cos(x24)*sin(x25)+sin(x22+x23)*cos(x25))-sin(x21)*sin(x24)*sin(x25);

r142=cos(x21)*[0.02032*cos(x22+x23)-0.43307*sin(x22+x23)+0.4318*cos(x22)]-0.14909*sin(x21);

r212=sin(x21)*[cos(x22+x23)*(cos(x24)*cos(x25)*cos(x26)-sin(x24)*sin(x26))-sin(x22+x23)*sin(x25)*cos(x26)]-cos(x21)*(sin(x24)*cos(x25)*cos(x26)+cos(x24)*sin(x26));

r222=sin(x21)*[-cos(x22+x23)*(cos(x24)*cos(x25)*sin(x26)+sin(x24)*cos(x26))+sin(x22+x23)*sin(x25)*sin(x26)]-cos(x21)*(-sin(x24)*cos(x25)*sin(x26)+cos(x24)*cos(x26));

r232=-sin(x21)*(cos(x22+x23)*cos(x24)*sin(x25)+sin(x22+x23)*cos(x25))+cos(x21)*sin(x24)*sin(x25);

r242=sin(x21)*[0.02032*cos(x22+x23)-0.43307*sin(x22+x23)+0.4318*cos(x22)]+0.14909*cos(x21);

r312=-sin(x22+x23)*(cos(x24)*cos(x25)*cos(x26)-sin(x24)*sin(x26))-cos(x22+x23)*sin(x25)*cos(x26);

r322=sin(x22+x23)*(cos(x24)*cos(x25)*sin(x26)+sin(x24)*cos(x26))+cos(x22+x23)*sin(x25)*sin(x26);

r332=sin(x22+x23)*cos(x24)*sin(x25)-cos(x22+x23)*cos(x25);

r342=-0.02032*sin(x22+x23)-0.43307*cos(x22+x23)-0.4318*sin(x22);

r412=0;

r422=0;

r432=0;

r442=1;

A2=[r112 r122 r132 r142;r212 r222 r232 r242;r312 r322 r332 r342;r412 r422 r432 r442];

F(i,2)=norm((A2-T));

r113=cos(x31)*[cos(x32+x33)*(cos(x34)*cos(x35)*cos(x36)-sin(x34)*sin(x36))-sin(x32+x33)*sin(x35)*cos(x36)]+sin(x31)*(sin(x34)*cos(x35)*cos(x36)+cos(x34)*sin(x36));

r123=cos(x31)*[-cos(x32+x33)*(cos(x34)*cos(x35)*sin(x36)+sin(x34)*cos(x36))+sin(x32+x33)*sin(x35)*sin(x36)]+sin(x31)*(-sin(x34)*cos(x35)*sin(x36)+cos(x34)*cos(x36));

r133= -cos(x31)*(cos(x32+x33)*cos(x34)*sin(x35)+sin(x32+x33)*cos(x35))-sin(x31)*sin(x34)*sin(x35);

r143=cos(x31)*[0.02032*cos(x32+x33)-0.43307*sin(x32+x33)+0.4318*cos(x32)]-0.14909*sin(x31);

r213=sin(x31)*[cos(x32+x33)*(cos(x34)*cos(x35)*cos(x36)-sin(x34)*sin(x36))-sin(x32+x33)*sin(x35)*cos(x36)]-cos(x31)*(sin(x34)*cos(x35)*cos(x36)+cos(x34)*sin(x36));

r223=sin(x31)*[-cos(x32+x33)*(cos(x34)*cos(x35)*sin(x36)+sin(x34)*cos(x36))+sin(x32+x33)*sin(x35)*sin(x36)]-cos(x31)*(-sin(x34)*cos(x35)*sin(x36)+cos(x34)*cos(x36));

r233=-sin(x31)*(cos(x32+x33)*cos(x34)*sin(x35)+sin(x32+x33)*cos(x35))+cos(x31)*sin(x34)*sin(x35);

r243=sin(x31)*[0.02032*cos(x32+x33)-0.43307*sin(x32+x33)+0.4318*cos(x32)]+0.14909*cos(x31);

r313=-sin(x32+x33)*(cos(x34)*cos(x35)*cos(x36)-sin(x34)*sin(x36))-cos(x32+x33)*sin(x35)*cos(x36);

r323=sin(x32+x33)*(cos(x34)*cos(x35)*sin(x36)+sin(x34)*cos(x36))+cos(x32+x33)*sin(x35)*sin(x36);

r333=sin(x32+x33)*cos(x34)*sin(x35)-cos(x32+x33)*cos(x35);

r343=-0.02032*sin(x32+x33)-0.43307*cos(x32+x33)-0.4318*sin(x32);

r413=0;

r423=0;

r433=0;

r443=1;

A3=[r113 r123 r133 r143;r213 r223 r233 r243;r313 r323 r333 r343;r413 r423 r433 r443];

F(i,3)=norm((A3-T));

x11=oldx(i,1,1);x12=oldx(i,2,1);x13=oldx(i,3,1);x14=oldx(i,4,1);x15=oldx(i,5,1);x16=oldx(i,6,1);

x21=oldx(i,1,2);x22=oldx(i,2,2);x23=oldx(i,3,2);x24=oldx(i,4,2);x25=oldx(i,5,2);x26=oldx(i,6,2);

x31=oldx(i,1,3);x32=oldx(i,2,3);x33=oldx(i,3,3);x34=oldx(i,4,3);x35=oldx(i,5,3);x36=oldx(i,6,3);

%三条链代表的三个解代入表达式

%T为机械手臂的目标位置矩阵

T=[0.5322 -0.1137 -0.8390 0.0833;-0.4697 -0.8641 -0.1809 0.1890;-0.7044 0.4903 -0.5133 -0.4925;0 0 0 1];

%用每条链的6个角度值求出当前位置矩阵（此处表达式较为复杂，细心编入）

%F为当前位置矩阵与目标位置矩阵的二范数（即当前位置与目标位置的距离）

r111=cos(x11)*[cos(x12+x13)*(cos(x14)*cos(x15)*cos(x16)-sin(x14)*sin(x16))-sin(x12+x13)*sin(x15)*cos(x16)]+sin(x11)*(sin(x14)*cos(x15)*cos(x16)+cos(x14)*sin(x16));

r121=cos(x11)*[-cos(x12+x13)*(cos(x14)*cos(x15)*sin(x16)+sin(x14)*cos(x16))+sin(x12+x13)*sin(x15)*sin(x16)]+sin(x11)*(-sin(x14)*cos(x15)*sin(x16)+cos(x14)*cos(x16));

r131=-cos(x11)*(cos(x12+x13)*cos(x14)*sin(x15)+sin(x12+x13)*cos(x15))-sin(x11)*sin(x14)*sin(x15);

r141=cos(x11)*[0.02032*cos(x12+x13)-0.43307*sin(x12+x13)+0.4318*cos(x12)]-0.14909*sin(x11);

r211=sin(x11)*[cos(x12+x13)*(cos(x14)*cos(x15)*cos(x16)-sin(x14)*sin(x16))-sin(x12+x13)*sin(x15)*cos(x16)]-cos(x11)*(sin(x14)*cos(x15)*cos(x16)+cos(x14)*sin(x16));

r221=sin(x11)*[-cos(x12+x13)*(cos(x14)*cos(x15)*sin(x16)+sin(x14)*cos(x16))+sin(x12+x13)*sin(x15)*sin(x16)]-cos(x11)*(-sin(x14)*cos(x15)*sin(x16)+cos(x14)*cos(x16));

r231=-sin(x11)*(cos(x12+x13)*cos(x14)*sin(x15)+sin(x12+x13)*cos(x15))+cos(x11)*sin(x14)*sin(x15);

r241=sin(x11)*[0.02032*cos(x12+x13)-0.43307*sin(x12+x13)+0.4318*cos(x12)]+0.14909*cos(x11);

r311=-sin(x12+x13)*(cos(x14)*cos(x15)*cos(x16)-sin(x14)*sin(x16))-cos(x12+x13)*sin(x15)*cos(x16);

r321=sin(x12+x13)*(cos(x14)*cos(x15)*sin(x16)+sin(x14)*cos(x16))+cos(x12+x13)*sin(x15)*sin(x16);

r331=sin(x12+x13)*cos(x14)*sin(x15)-cos(x12+x13)*cos(x15);

r341=-0.02032*sin(x12+x13)-0.43307*cos(x12+x13)-0.4318*sin(x12);

r411=0;

r421=0;

r431=0;

r441=1;

A1old=[r111 r121 r131 r141;r211 r221 r231 r241;r311 r321 r331 r341;r411 r421 r431 r441];

oldF(i,1)=norm((A1old-T));

r112=cos(x21)*[cos(x22+x23)*(cos(x24)*cos(x25)*cos(x26)-sin(x24)*sin(x26))-sin(x22+x23)*sin(x25)*cos(x26)]+sin(x21)*(sin(x24)*cos(x25)*cos(x26)+cos(x24)*sin(x26));

r122=cos(x21)*[-cos(x22+x23)*(cos(x24)*cos(x25)*sin(x26)+sin(x24)*cos(x26))+sin(x22+x23)*sin(x25)*sin(x26)]+sin(x21)*(-sin(x24)*cos(x25)*sin(x26)+cos(x24)*cos(x26));

r132=-cos(x21)*(cos(x22+x23)*cos(x24)*sin(x25)+sin(x22+x23)*cos(x25))-sin(x21)*sin(x24)*sin(x25);

r142=cos(x21)*[0.02032*cos(x22+x23)-0.43307*sin(x22+x23)+0.4318*cos(x22)]-0.14909*sin(x21);

r212=sin(x21)*[cos(x22+x23)*(cos(x24)*cos(x25)*cos(x26)-sin(x24)*sin(x26))-sin(x22+x23)*sin(x25)*cos(x26)]-cos(x21)*(sin(x24)*cos(x25)*cos(x26)+cos(x24)*sin(x26));

r222=sin(x21)*[-cos(x22+x23)*(cos(x24)*cos(x25)*sin(x26)+sin(x24)*cos(x26))+sin(x22+x23)*sin(x25)*sin(x26)]-cos(x21)*(-sin(x24)*cos(x25)*sin(x26)+cos(x24)*cos(x26));

r232=-sin(x21)*(cos(x22+x23)*cos(x24)*sin(x25)+sin(x22+x23)*cos(x25))+cos(x21)*sin(x24)*sin(x25);

r242=sin(x21)*[0.02032*cos(x22+x23)-0.43307*sin(x22+x23)+0.4318*cos(x22)]+0.14909*cos(x21);

r312=-sin(x22+x23)*(cos(x24)*cos(x25)*cos(x26)-sin(x24)*sin(x26))-cos(x22+x23)*sin(x25)*cos(x26);

r322=sin(x22+x23)*(cos(x24)*cos(x25)*sin(x26)+sin(x24)*cos(x26))+cos(x22+x23)*sin(x25)*sin(x26);

r332=sin(x22+x23)*cos(x24)*sin(x25)-cos(x22+x23)*cos(x25);

r342=-0.02032*sin(x22+x23)-0.43307*cos(x22+x23)-0.4318*sin(x22);

r412=0;

r422=0;

r432=0;

r442=1;

A2old=[r112 r122 r132 r142;r212 r222 r232 r242;r312 r322 r332 r342;r412 r422 r432 r442];

oldF(i,2)=norm((A2old-T));

r113=cos(x31)*[cos(x32+x33)*(cos(x34)*cos(x35)*cos(x36)-sin(x34)*sin(x36))-sin(x32+x33)*sin(x35)*cos(x36)]+sin(x31)*(sin(x34)*cos(x35)*cos(x36)+cos(x34)*sin(x36));

r123=cos(x31)*[-cos(x32+x33)*(cos(x34)*cos(x35)*sin(x36)+sin(x34)*cos(x36))+sin(x32+x33)*sin(x35)*sin(x36)]+sin(x31)*(-sin(x34)*cos(x35)*sin(x36)+cos(x34)*cos(x36));

r133= -cos(x31)*(cos(x32+x33)*cos(x34)*sin(x35)+sin(x32+x33)*cos(x35))-sin(x31)*sin(x34)*sin(x35);

r143=cos(x31)*[0.02032*cos(x32+x33)-0.43307*sin(x32+x33)+0.4318*cos(x32)]-0.14909*sin(x31);

r213=sin(x31)*[cos(x32+x33)*(cos(x34)*cos(x35)*cos(x36)-sin(x34)*sin(x36))-sin(x32+x33)*sin(x35)*cos(x36)]-cos(x31)*(sin(x34)*cos(x35)*cos(x36)+cos(x34)*sin(x36));

r223=sin(x31)*[-cos(x32+x33)*(cos(x34)*cos(x35)*sin(x36)+sin(x34)*cos(x36))+sin(x32+x33)*sin(x35)*sin(x36)]-cos(x31)*(-sin(x34)*cos(x35)*sin(x36)+cos(x34)*cos(x36));

r233=-sin(x31)*(cos(x32+x33)*cos(x34)*sin(x35)+sin(x32+x33)*cos(x35))+cos(x31)*sin(x34)*sin(x35);

r243=sin(x31)*[0.02032*cos(x32+x33)-0.43307*sin(x32+x33)+0.4318*cos(x32)]+0.14909*cos(x31);

r313=-sin(x32+x33)*(cos(x34)*cos(x35)*cos(x36)-sin(x34)*sin(x36))-cos(x32+x33)*sin(x35)*cos(x36);

r323=sin(x32+x33)*(cos(x34)*cos(x35)*sin(x36)+sin(x34)*cos(x36))+cos(x32+x33)*sin(x35)*sin(x36);

r333=sin(x32+x33)*cos(x34)*sin(x35)-cos(x32+x33)*cos(x35);

r343=-0.02032*sin(x32+x33)-0.43307*cos(x32+x33)-0.4318*sin(x32);

r413=0;

r423=0;

r433=0;

r443=1;

A3old=[r113 r123 r133 r143;r213 r223 r233 r243;r313 r323 r333 r343;r413 r423 r433 r443];

oldF(i,3)=norm((A3old-T));

%开始计算适应度

fitness(i,1)=F(i,1);

fitness(i,2)=F(i,2);

fitness(i,3)=F(i,3);

oldfitness(i,1)=oldF(i,1);

oldfitness(i,2)=oldF(i,2);

oldfitness(i,3)=oldF(i,3);

%计算适应度结束

end

%开始获得最小值及相应自变量

[Bestf,Indexf]=sort(F,2);

[BestF,IndexF]=sort(Bestf,1);

gBestfi=BestF(1,1);%最小函数值

gBestp=IndexF(1,1);%最好染色体号

gBests=Indexf(gBestp,1);%最好基因链号

gBestfai=fai(gBestp,:);%最优染色体的fai

gBestsita=sita(gBestp,:);%最优染色体的sita

gBestx=x(gBestp,:,gBests);%最优解

gBestC=p(gBestp,:,:);%最优染色体

gBestpfitness=fitness(gBestp,gBests);%最优解的适应度

gBadp=IndexF(Size,3);%最差染色体号

gBads=Indexf(gBadp,3);%最差染色体链号

[oldBestf,oldIndexf]=sort(oldF,2);

[oldBestF,oldIndexF]=sort(oldBestf,1);

oldgBestfi=oldBestF(1,1);%最小函数值

oldgBestp=oldIndexF(1,1);%最好染色体号

oldgBests=oldIndexf(oldgBestp,1);%最好基因链号

oldgBestfai=fai(oldgBestp,:);%最优染色体的fai

oldgBestsita=sita(oldgBestp,:);%最优染色体的sita

oldgBestx=oldx(oldgBestp,:,oldgBests);%最优解

oldgBestC=oldp(oldgBestp,:,:);%最优染色体

oldgBestpfitness=oldfitness(oldgBests,oldgBests);%最优解的适应度

%获得最大最小梯度

for i=1:1:Size

td(i,1)=abs(fitness(i,Indexf(i,1))-oldfitness(i,oldIndexf(i,1)));

end

TD=sort(td,1);

MinTD=TD(1,1);

MaxTD=TD(Size,1);

%获得最大最小梯度结束

%主循环开始

for kg=1:1:G

time(kg)=kg;

%开始更新量子位

for i=1:1:Size

if td(i,1)>TD((1/5)*Size,1)

for j=1:1:CodeL

if p(i,j,1)*gBestC(1,j,2)>gBestC(1,j,1)*p(i,j,2)

fai(i,j)=fai(i,j)+0.05*pi*exp(-(td(i,1)-MinTD)/(MaxTD-MinTD));

end

if p(i,j,1)*gBestC(1,j,2)<gBestC(1,j,1)*p(i,j,2)

fai(i,j)=fai(i,j)-0.05*pi*exp(-(td(i,1)-MinTD)/(MaxTD-MinTD));

end

if gBestC(1,j,3)>p(i,j,3)

sita(i,j)=sita(i,j)-0.05*pi*exp(-(td(i,1)-MinTD)/(MaxTD-MinTD));

end

if gBestC(1,j,3)<p(i,j,3)

sita(i,j)=sita(i,j)+0.05*pi*exp(-(td(i,1)-MinTD)/(MaxTD-MinTD));

end

end

else

for j=1:1:CodeL

if p(i,j,1)*gBestC(1,j,2)>gBestC(1,j,1)*p(i,j,2)

fai(i,j)=fai(i,j)+0.05*pi*(G-kg)/G;

end

if p(i,j,1)*gBestC(1,j,2)<gBestC(1,j,1)*p(i,j,2)

fai(i,j)=fai(i,j)-0.05*pi*(G-kg)/G;

end

if gBestC(1,j,3)>p(i,j,3)

sita(i,j)=sita(i,j)-0.05*pi*(G-kg)/G;

end

if gBestC(1,j,3)<p(i,j,3)

sita(i,j)=sita(i,j)+0.05*pi*(G-kg)/G;

end

end

end

end

%结束更新量子位

%开始变异量子位

Pm_rand=rand(Size,CodeL);%生成随机数，与变异概率比较，决定是否变异。

for i=1:1:Size

for j=1:1:CodeL

Pm=ones(1,Size)*pm0*(G-kg)/G;

if Pm(i)>Pm_rand(i,j)&(i==gBestp)

fai(i,j)=0.5*pi-fai(i,j);

sita(i,j)=0.5*pi-sita(i,j);

end

end

end

%结束变异量子位

%代间复制

oldp=p;

oldx=x;

oldfitness=fitness;

%生成新的染色体开始

p(:,1,1)=cos(fai(:,1)).*sin(sita(:,1));

p(:,1,2)=sin(fai(:,1)).*sin(sita(:,1));

p(:,1,3)=cos(sita(:,1));

p(:,2,1)=cos(fai(:,2)).*sin(sita(:,2));

p(:,2,2)=sin(fai(:,2)).*sin(sita(:,2));

p(:,2,3)=cos(sita(:,2));

p(:,3,1)=cos(fai(:,3)).*sin(sita(:,3));

p(:,3,2)=sin(fai(:,3)).*sin(sita(:,3));

p(:,3,3)=cos(sita(:,3));

p(:,4,1)=cos(fai(:,4)).*sin(sita(:,4));

p(:,4,2)=sin(fai(:,4)).*sin(sita(:,4));

p(:,4,3)=cos(sita(:,4));

p(:,5,1)=cos(fai(:,5)).*sin(sita(:,5));

p(:,5,2)=sin(fai(:,5)).*sin(sita(:,5));

p(:,5,3)=cos(sita(:,5));

p(:,6,1)=cos(fai(:,6)).*sin(sita(:,6));

p(:,6,2)=sin(fai(:,6)).*sin(sita(:,6));

p(:,6,3)=cos(sita(:,6));

%生成染色体结束

%解空间变换开始

x(:,1,:)=0.5*(MaxX(1)*(1+p(:,1,:))+MinX(1)*(1-p(:,1,:)));

x(:,2,:)=0.5*(MaxX(2)*(1+p(:,2,:))+MinX(2)*(1-p(:,2,:)));

x(:,3,:)=0.5*(MaxX(3)*(1+p(:,3,:))+MinX(3)*(1-p(:,3,:)));

x(:,4,:)=0.5*(MaxX(4)*(1+p(:,4,:))+MinX(4)*(1-p(:,4,:)));

x(:,5,:)=0.5*(MaxX(5)*(1+p(:,5,:))+MinX(5)*(1-p(:,5,:)));

x(:,6,:)=0.5*(MaxX(6)*(1+p(:,6,:))+MinX(6)*(1-p(:,6,:)));

%解空间变换结束

%计算函数值开始

for i=1:1:Size

x11=x(i,1,1);x12=x(i,2,1);x13=x(i,3,1);x14=x(i,4,1);x15=x(i,5,1);x16=x(i,6,1);

x21=x(i,1,2);x22=x(i,2,2);x23=x(i,3,2);x24=x(i,4,2);x25=x(i,5,2);x26=x(i,6,2);

x31=x(i,1,3);x32=x(i,2,3);x33=x(i,3,3);x34=x(i,4,3);x35=x(i,5,3);x36=x(i,6,3);

%三条链代表的三个解代入表达式

%T为机械手臂的目标位置矩阵

T=[0.5322 -0.1137 -0.8390 0.0833;-0.4697 -0.8641 -0.1809 0.1890;-0.7044 0.4903 -0.5133 -0.4925;0 0 0 1];

%用每条链的6个角度值求出当前位置矩阵（此处表达式较为复杂，细心编入）

%F为当前位置矩阵与目标位置矩阵的二范数（即当前位置与目标位置的距离）

r111=cos(x11)*[cos(x12+x13)*(cos(x14)*cos(x15)*cos(x16)-sin(x14)*sin(x16))-sin(x12+x13)*sin(x15)*cos(x16)]+sin(x11)*(sin(x14)*cos(x15)*cos(x16)+cos(x14)*sin(x16));

r121=cos(x11)*[-cos(x12+x13)*(cos(x14)*cos(x15)*sin(x16)+sin(x14)*cos(x16))+sin(x12+x13)*sin(x15)*sin(x16)]+sin(x11)*(-sin(x14)*cos(x15)*sin(x16)+cos(x14)*cos(x16));

r131=-cos(x11)*(cos(x12+x13)*cos(x14)*sin(x15)+sin(x12+x13)*cos(x15))-sin(x11)*sin(x14)*sin(x15);

r141=cos(x11)*[0.02032*cos(x12+x13)-0.43307*sin(x12+x13)+0.4318*cos(x12)]-0.14909*sin(x11);

r211=sin(x11)*[cos(x12+x13)*(cos(x14)*cos(x15)*cos(x16)-sin(x14)*sin(x16))-sin(x12+x13)*sin(x15)*cos(x16)]-cos(x11)*(sin(x14)*cos(x15)*cos(x16)+cos(x14)*sin(x16));

r221=sin(x11)*[-cos(x12+x13)*(cos(x14)*cos(x15)*sin(x16)+sin(x14)*cos(x16))+sin(x12+x13)*sin(x15)*sin(x16)]-cos(x11)*(-sin(x14)*cos(x15)*sin(x16)+cos(x14)*cos(x16));

r231=-sin(x11)*(cos(x12+x13)*cos(x14)*sin(x15)+sin(x12+x13)*cos(x15))+cos(x11)*sin(x14)*sin(x15);

r241=sin(x11)*[0.02032*cos(x12+x13)-0.43307*sin(x12+x13)+0.4318*cos(x12)]+0.14909*cos(x11);

r311=-sin(x12+x13)*(cos(x14)*cos(x15)*cos(x16)-sin(x14)*sin(x16))-cos(x12+x13)*sin(x15)*cos(x16);

r321=sin(x12+x13)*(cos(x14)*cos(x15)*sin(x16)+sin(x14)*cos(x16))+cos(x12+x13)*sin(x15)*sin(x16);

r331=sin(x12+x13)*cos(x14)*sin(x15)-cos(x12+x13)*cos(x15);

r341=-0.02032*sin(x12+x13)-0.43307*cos(x12+x13)-0.4318*sin(x12);

r411=0;

r421=0;

r431=0;

r441=1;

A1=[r111 r121 r131 r141;r211 r221 r231 r241;r311 r321 r331 r341;r411 r421 r431 r441];

F(i,1)=norm((A1-T));

r112=cos(x21)*[cos(x22+x23)*(cos(x24)*cos(x25)*cos(x26)-sin(x24)*sin(x26))-sin(x22+x23)*sin(x25)*cos(x26)]+sin(x21)*(sin(x24)*cos(x25)*cos(x26)+cos(x24)*sin(x26));

r122=cos(x21)*[-cos(x22+x23)*(cos(x24)*cos(x25)*sin(x26)+sin(x24)*cos(x26))+sin(x22+x23)*sin(x25)*sin(x26)]+sin(x21)*(-sin(x24)*cos(x25)*sin(x26)+cos(x24)*cos(x26));

r132=-cos(x21)*(cos(x22+x23)*cos(x24)*sin(x25)+sin(x22+x23)*cos(x25))-sin(x21)*sin(x24)*sin(x25);

r142=cos(x21)*[0.02032*cos(x22+x23)-0.43307*sin(x22+x23)+0.4318*cos(x22)]-0.14909*sin(x21);

r212=sin(x21)*[cos(x22+x23)*(cos(x24)*cos(x25)*cos(x26)-sin(x24)*sin(x26))-sin(x22+x23)*sin(x25)*cos(x26)]-cos(x21)*(sin(x24)*cos(x25)*cos(x26)+cos(x24)*sin(x26));

r222=sin(x21)*[-cos(x22+x23)*(cos(x24)*cos(x25)*sin(x26)+sin(x24)*cos(x26))+sin(x22+x23)*sin(x25)*sin(x26)]-cos(x21)*(-sin(x24)*cos(x25)*sin(x26)+cos(x24)*cos(x26));

r232=-sin(x21)*(cos(x22+x23)*cos(x24)*sin(x25)+sin(x22+x23)*cos(x25))+cos(x21)*sin(x24)*sin(x25);

r242=sin(x21)*[0.02032*cos(x22+x23)-0.43307*sin(x22+x23)+0.4318*cos(x22)]+0.14909*cos(x21);

r312=-sin(x22+x23)*(cos(x24)*cos(x25)*cos(x26)-sin(x24)*sin(x26))-cos(x22+x23)*sin(x25)*cos(x26);

r322=sin(x22+x23)*(cos(x24)*cos(x25)*sin(x26)+sin(x24)*cos(x26))+cos(x22+x23)*sin(x25)*sin(x26);

r332=sin(x22+x23)*cos(x24)*sin(x25)-cos(x22+x23)*cos(x25);

r342=-0.02032*sin(x22+x23)-0.43307*cos(x22+x23)-0.4318*sin(x22);

r412=0;

r422=0;

r432=0;

r442=1;

A2=[r112 r122 r132 r142;r212 r222 r232 r242;r312 r322 r332 r342;r412 r422 r432 r442];

F(i,2)=norm((A2-T));

r113=cos(x31)*[cos(x32+x33)*(cos(x34)*cos(x35)*cos(x36)-sin(x34)*sin(x36))-sin(x32+x33)*sin(x35)*cos(x36)]+sin(x31)*(sin(x34)*cos(x35)*cos(x36)+cos(x34)*sin(x36));

r123=cos(x31)*[-cos(x32+x33)*(cos(x34)*cos(x35)*sin(x36)+sin(x34)*cos(x36))+sin(x32+x33)*sin(x35)*sin(x36)]+sin(x31)*(-sin(x34)*cos(x35)*sin(x36)+cos(x34)*cos(x36));

r133= -cos(x31)*(cos(x32+x33)*cos(x34)*sin(x35)+sin(x32+x33)*cos(x35))-sin(x31)*sin(x34)*sin(x35);

r143=cos(x31)*[0.02032*cos(x32+x33)-0.43307*sin(x32+x33)+0.4318*cos(x32)]-0.14909*sin(x31);

r213=sin(x31)*[cos(x32+x33)*(cos(x34)*cos(x35)*cos(x36)-sin(x34)*sin(x36))-sin(x32+x33)*sin(x35)*cos(x36)]-cos(x31)*(sin(x34)*cos(x35)*cos(x36)+cos(x34)*sin(x36));

r223=sin(x31)*[-cos(x32+x33)*(cos(x34)*cos(x35)*sin(x36)+sin(x34)*cos(x36))+sin(x32+x33)*sin(x35)*sin(x36)]-cos(x31)*(-sin(x34)*cos(x35)*sin(x36)+cos(x34)*cos(x36));

r233=-sin(x31)*(cos(x32+x33)*cos(x34)*sin(x35)+sin(x32+x33)*cos(x35))+cos(x31)*sin(x34)*sin(x35);

r243=sin(x31)*[0.02032*cos(x32+x33)-0.43307*sin(x32+x33)+0.4318*cos(x32)]+0.14909*cos(x31);

r313=-sin(x32+x33)*(cos(x34)*cos(x35)*cos(x36)-sin(x34)*sin(x36))-cos(x32+x33)*sin(x35)*cos(x36);

r323=sin(x32+x33)*(cos(x34)*cos(x35)*sin(x36)+sin(x34)*cos(x36))+cos(x32+x33)*sin(x35)*sin(x36);

r333=sin(x32+x33)*cos(x34)*sin(x35)-cos(x32+x33)*cos(x35);

r343=-0.02032*sin(x32+x33)-0.43307*cos(x32+x33)-0.4318*sin(x32);

r413=0;

r423=0;

r433=0;

r443=1;

A3=[r113 r123 r133 r143;r213 r223 r233 r243;r313 r323 r333 r343;r413 r423 r433 r443];

F(i,3)=norm((A3-T));

%开始计算适应度

fitness(i,1)=F(i,1);

fitness(i,2)=F(i,2);

fitness(i,3)=F(i,3);

end

%开始获得最小值及相应自变量

[Bestf,Indexf]=sort(F,2);

[BestF,IndexF]=sort(Bestf,1);

Bestfi=BestF(1,1);%最小函数值

Bestp=IndexF(1,1);%最好染色体号

Bests=Indexf(Bestp,1);%最好基因链号

Bestfai=fai(Bestp,:);%最优染色体的fai

Bestsita=sita(Bestp,:);%最优染色体的sita

Bestx=x(Bestp,:,Bests);%最优解

BestC=p(Bestp,:,:);%最优染色体

Bestpfitness=fitness(Bestp,Bests);%最优染色体的适应度

Badp=IndexF(Size,3);%最差染色体号

Bads=Indexf(Badp,3);%最差染色体链号

%获得最大最小梯度

for i=1:1:Size

td(i,1)=abs(fitness(i,Indexf(i,1))-oldfitness(i,oldIndexf(i,1)));

end

TD=sort(td,1);

MinTD=TD(1,1);

MaxTD=TD(Size,1);

%获得最大最小梯度结束

if Bestpfitness>gBestpfitness %适应度降低，若最优解退化则取回上代最优解

Bestfi=gBestfi;%当代最优解被全局最优解替换,显示

fai(Badp,:)=gBestfai(1,:);%因为gBestfai就一条染色体，所以染色体标号为1

sita(Badp,:)=gBestsita(1,:);

p(Badp,:,:)=gBestC(1,:,:);%当代最差染色体被全局最优染色体替换

x(Badp,:,Bads)=gBestx(1,:,1);%当代最差染色体的链被全局最优解替换

Bestpfitness(Badp,:)=gBestpfitness(1,:);%当代最差染色体的适应度被全局最优染色体的适应度替换

gBestp=Badp;%当代最差染色体成功变身最优个体。即此时的全局最优染色体号=当代最差染色体号

end

if Bestpfitness<=gBestpfitness %适应度提高，若最优解进化则将最优解替换

gBestfi=Bestfi;

gBestp=Bestp;

gBests=Bests;

gBestfai=Bestfai;

gBestsita=Bestsita;

gBestC=BestC;

gBestx=Bestx;

gBestpfitness=Bestpfitness;

gBadp=Badp;

gBads=Bads;

%启动以优代劣机制

%开始替换最差染色体 %改进处

if (gBads==1)&(gBests==1)%替换第一条链

p(gBadp,1,1)=cos(fai(gBestp,1)).*sin(sita(gBestp,1));

p(gBadp,2,1)=cos(fai(gBestp,2)).*sin(sita(gBestp,2));

p(gBadp,3,1)=cos(fai(gBestp,3)).*sin(sita(gBestp,3));

p(gBadp,4,1)=cos(fai(gBestp,4)).*sin(sita(gBestp,4));

p(gBadp,5,1)=cos(fai(gBestp,5)).*sin(sita(gBestp,5));

p(gBadp,6,1)=cos(fai(gBestp,6)).*sin(sita(gBestp,6));

p(gBadp,1,2)=sin(fai(gBadp,1)).*sin(sita(gBadp,1));

p(gBadp,2,2)=sin(fai(gBadp,2)).*sin(sita(gBadp,2));

p(gBadp,3,2)=sin(fai(gBadp,3)).*sin(sita(gBadp,3));

p(gBadp,4,2)=sin(fai(gBadp,4)).*sin(sita(gBadp,4));

p(gBadp,5,2)=sin(fai(gBadp,5)).*sin(sita(gBadp,5));

p(gBadp,6,2)=sin(fai(gBadp,6)).*sin(sita(gBadp,6));

p(gBadp,1,3)=cos(sita(gBadp,1));

p(gBadp,2,3)=cos(sita(gBadp,2));

p(gBadp,3,3)=cos(sita(gBadp,3));

p(gBadp,4,3)=cos(sita(gBadp,4));

p(gBadp,5,3)=cos(sita(gBadp,5));

p(gBadp,6,3)=cos(sita(gBadp,6));

end

if (gBads==2)&(gBests==2)%替换第二条链

p(gBadp,1,2)=sin(fai(gBestp,1)).*sin(sita(gBestp,1));

p(gBadp,2,2)=sin(fai(gBestp,2)).*sin(sita(gBestp,2));

p(gBadp,3,2)=sin(fai(gBestp,3)).*sin(sita(gBestp,3));

p(gBadp,4,2)=sin(fai(gBestp,4)).*sin(sita(gBestp,4));

p(gBadp,5,2)=sin(fai(gBestp,5)).*sin(sita(gBestp,5));

p(gBadp,6,2)=sin(fai(gBestp,6)).*sin(sita(gBestp,6));

p(gBadp,1,1)=cos(fai(gBadp,1)).*sin(sita(gBadp,1));

p(gBadp,2,1)=cos(fai(gBadp,2)).*sin(sita(gBadp,2));

p(gBadp,3,1)=cos(fai(gBadp,3)).*sin(sita(gBadp,3));

p(gBadp,4,1)=cos(fai(gBadp,4)).*sin(sita(gBadp,4));

p(gBadp,5,1)=cos(fai(gBadp,5)).*sin(sita(gBadp,5));

p(gBadp,6,1)=cos(fai(gBadp,6)).*sin(sita(gBadp,6));

p(gBadp,1,3)=cos(sita(gBadp,1));

p(gBadp,2,3)=cos(sita(gBadp,2));

p(gBadp,3,3)=cos(sita(gBadp,3));

p(gBadp,4,3)=cos(sita(gBadp,4));

p(gBadp,5,3)=cos(sita(gBadp,5));

p(gBadp,6,3)=cos(sita(gBadp,6));

end

if (gBads==3)&(gBests==3)%替换第三条链

p(gBadp,1,3)=cos(sita(gBestp,1));

p(gBadp,2,3)=cos(sita(gBestp,2));

p(gBadp,3,3)=cos(sita(gBestp,3));

p(gBadp,4,3)=cos(sita(gBestp,4));

p(gBadp,5,3)=cos(sita(gBestp,5));

p(gBadp,6,3)=cos(sita(gBestp,6));

p(gBadp,1,1)=cos(fai(gBadp,1)).*sin(sita(gBadp,1));

p(gBadp,2,1)=cos(fai(gBadp,2)).*sin(sita(gBadp,2));

p(gBadp,3,1)=cos(fai(gBadp,3)).*sin(sita(gBadp,3));

p(gBadp,4,1)=cos(fai(gBadp,4)).*sin(sita(gBadp,4));

p(gBadp,5,1)=cos(fai(gBadp,5)).*sin(sita(gBadp,5));

p(gBadp,6,1)=cos(fai(gBadp,6)).*sin(sita(gBadp,6));

p(gBadp,1,2)=sin(fai(gBadp,1)).*sin(sita(gBadp,1));

p(gBadp,2,2)=sin(fai(gBadp,2)).*sin(sita(gBadp,2));

p(gBadp,3,2)=sin(fai(gBadp,3)).*sin(sita(gBadp,3));

p(gBadp,4,2)=sin(fai(gBadp,4)).*sin(sita(gBadp,4));

p(gBadp,5,2)=sin(fai(gBadp,5)).*sin(sita(gBadp,5));

p(gBadp,6,2)=sin(fai(gBadp,6)).*sin(sita(gBadp,6));

end

if gBads~=gBests%替换整条染色体

p(gBadp,1,1)=cos(fai(gBestp,1)).*sin(sita(gBestp,1));

p(gBadp,1,2)=sin(fai(gBestp,1)).*sin(sita(gBestp,1));

p(gBadp,1,3)=cos(sita(gBestp,1));

p(gBadp,2,1)=cos(fai(gBestp,2)).*sin(sita(gBestp,2));

p(gBadp,2,2)=sin(fai(gBestp,2)).*sin(sita(gBestp,2));

p(gBadp,2,3)=cos(sita(gBestp,2));

p(gBadp,3,1)=cos(fai(gBestp,3)).*sin(sita(gBestp,3));

p(gBadp,3,2)=sin(fai(gBestp,3)).*sin(sita(gBestp,3));

p(gBadp,3,3)=cos(sita(gBestp,3));

p(gBadp,4,1)=cos(fai(gBestp,4)).*sin(sita(gBestp,4));

p(gBadp,4,2)=sin(fai(gBestp,4)).*sin(sita(gBestp,4));

p(gBadp,4,3)=cos(sita(gBestp,4));

p(gBadp,5,1)=cos(fai(gBestp,5)).*sin(sita(gBestp,5));

p(gBadp,5,2)=sin(fai(gBestp,5)).*sin(sita(gBestp,5));

p(gBadp,5,3)=cos(sita(gBestp,5));

p(gBadp,6,1)=cos(fai(gBestp,6)).*sin(sita(gBestp,6));

p(gBadp,6,2)=sin(fai(gBestp,6)).*sin(sita(gBestp,6));

p(gBadp,6,3)=cos(sita(gBestp,6));

end

%替代结束

end

%记录最小值及评价值

Bfi(kg)=gBestfi;

%显示当前代数及优化结果

end

%显示最小值

gBestfi

%显示最优解

gBestx

%画图

figure(1);

plot(time,Bfi,'b');

xlabel('迭代次数');ylabel('评价函数F的值');

hold on;

GQtu;%GQ注解掉程序开头的clear all close all 即可

hold off;

title('评价函数变化曲线比较');

legend('改进BQGA','BQGA');

% 改进前程序 命名为：GQtu.m 程序

%（1）没压缩取值范围 （2）染色体更新的固定转角 （3）染色体的变异固定概率 （4）防退化机制不完备

%clear all;

%close all;

Size=100;

CodeL=6;

MinX(1)=-8/9*pi;

MaxX(1)=8/9*pi;

MinX(2)=-5/4*pi;

MaxX(2)=1/4*pi;

MinX(3)=-1/4*pi;

MaxX(3)=5/4*pi;

MinX(4)=-11/18*pi;

MaxX(4)=17/18*pi;

MinX(5)=-5/9*pi;

MaxX(5)=5/9*pi;

MinX(6)=-133/90*pi;

MaxX(6)=133/90*pi;

%初始化开始

fai(:,1)=2*pi*rand(Size,1);

sita(:,1)=pi*rand(Size,1);

fai(:,2)=2*pi*rand(Size,1);

sita(:,2)=pi*rand(Size,1);

fai(:,3)=2*pi*rand(Size,1);

sita(:,3)=pi*rand(Size,1);

fai(:,4)=2*pi*rand(Size,1);

sita(:,4)=pi*rand(Size,1);

fai(:,5)=2*pi*rand(Size,1);

sita(:,5)=pi*rand(Size,1);

fai(:,6)=2*pi*rand(Size,1);

sita(:,6)=pi*rand(Size,1);

oldfai(:,1)=2*pi*rand(Size,1);

oldsita(:,1)=pi*rand(Size,1);

oldfai(:,2)=2*pi*rand(Size,1);

oldsita(:,2)=pi*rand(Size,1);

oldfai(:,3)=2*pi*rand(Size,1);

oldsita(:,3)=pi*rand(Size,1);

oldfai(:,4)=2*pi*rand(Size,1);

oldsita(:,4)=pi*rand(Size,1);

oldfai(:,5)=2*pi*rand(Size,1);

oldsita(:,5)=pi*rand(Size,1);

oldfai(:,6)=2*pi*rand(Size,1);

oldsita(:,6)=pi*rand(Size,1);

p(:,1,1)=cos(fai(:,1)).*sin(sita(:,1));

p(:,1,2)=sin(fai(:,1)).*sin(sita(:,1));

p(:,1,3)=cos(sita(:,1));

p(:,2,1)=cos(fai(:,2)).*sin(sita(:,2));

p(:,2,2)=sin(fai(:,2)).*sin(sita(:,2));

p(:,2,3)=cos(sita(:,2));

p(:,3,1)=cos(fai(:,3)).*sin(sita(:,3));

p(:,3,2)=sin(fai(:,3)).*sin(sita(:,3));

p(:,3,3)=cos(sita(:,3));

p(:,4,1)=cos(fai(:,4)).*sin(sita(:,4));

p(:,4,2)=sin(fai(:,4)).*sin(sita(:,4));

p(:,4,3)=cos(sita(:,4));

p(:,5,1)=cos(fai(:,5)).*sin(sita(:,5));

p(:,5,2)=sin(fai(:,5)).*sin(sita(:,5));

p(:,5,3)=cos(sita(:,5));

p(:,6,1)=cos(fai(:,6)).*sin(sita(:,6));

p(:,6,2)=sin(fai(:,6)).*sin(sita(:,6));

p(:,6,3)=cos(sita(:,6));

oldp(:,1,1)=cos(oldfai(:,1)).*sin(oldsita(:,1));

oldp(:,1,2)=sin(oldfai(:,1)).*sin(oldsita(:,1));

oldp(:,1,3)=cos(oldsita(:,1));

oldp(:,2,1)=cos(oldfai(:,2)).*sin(oldsita(:,2));

oldp(:,2,2)=sin(oldfai(:,2)).*sin(oldsita(:,2));

oldp(:,2,3)=cos(oldsita(:,2));

oldp(:,3,1)=cos(oldfai(:,3)).*sin(oldsita(:,3));

oldp(:,3,2)=sin(oldfai(:,3)).*sin(oldsita(:,3));

oldp(:,3,3)=cos(oldsita(:,3));

oldp(:,4,1)=cos(oldfai(:,4)).*sin(oldsita(:,4));

oldp(:,4,2)=sin(oldfai(:,4)).*sin(oldsita(:,4));

oldp(:,4,3)=cos(oldsita(:,4));

oldp(:,5,1)=cos(oldfai(:,5)).*sin(oldsita(:,5));

oldp(:,5,2)=sin(oldfai(:,5)).*sin(oldsita(:,5));

oldp(:,5,3)=cos(oldsita(:,5));

oldp(:,6,1)=cos(oldfai(:,6)).*sin(oldsita(:,6));

oldp(:,6,2)=sin(oldfai(:,6)).*sin(oldsita(:,6));

oldp(:,6,3)=cos(oldsita(:,6));

pm0=0.1;%设置变异概率初始值 pm放在主循环中了，随迭代次数变化 Pm=ones(1,Size)*pm0*(G-kg)/G;

G=1000;%设置代数

x(:,1,:)=0.5*(MaxX(1)*(1+p(:,1,:))+MinX(1)*(1-p(:,1,:)));

x(:,2,:)=0.5*(MaxX(2)*(1+p(:,2,:))+MinX(2)*(1-p(:,2,:)));

x(:,3,:)=0.5*(MaxX(3)*(1+p(:,3,:))+MinX(3)*(1-p(:,3,:)));

x(:,4,:)=0.5*(MaxX(4)*(1+p(:,4,:))+MinX(4)*(1-p(:,4,:)));

x(:,5,:)=0.5*(MaxX(5)*(1+p(:,5,:))+MinX(5)*(1-p(:,5,:)));

x(:,6,:)=0.5*(MaxX(6)*(1+p(:,6,:))+MinX(6)*(1-p(:,6,:)));

oldx(:,1,:)=0.5*(MaxX(1)*(1+oldp(:,1,:))+MinX(1)*(1-oldp(:,1,:)));

oldx(:,2,:)=0.5*(MaxX(2)*(1+oldp(:,2,:))+MinX(2)*(1-oldp(:,2,:)));

oldx(:,3,:)=0.5*(MaxX(3)*(1+oldp(:,3,:))+MinX(3)*(1-oldp(:,3,:)));

oldx(:,4,:)=0.5*(MaxX(4)*(1+oldp(:,4,:))+MinX(4)*(1-oldp(:,4,:)));

oldx(:,5,:)=0.5*(MaxX(5)*(1+oldp(:,5,:))+MinX(5)*(1-oldp(:,5,:)));

oldx(:,6,:)=0.5*(MaxX(6)*(1+oldp(:,6,:))+MinX(6)*(1-oldp(:,6,:)));

%计算函数值开始

for i=1:1:Size

x11=x(i,1,1);x12=x(i,2,1);x13=x(i,3,1);x14=x(i,4,1);x15=x(i,5,1);x16=x(i,6,1);

x21=x(i,1,2);x22=x(i,2,2);x23=x(i,3,2);x24=x(i,4,2);x25=x(i,5,2);x26=x(i,6,2);

x31=x(i,1,3);x32=x(i,2,3);x33=x(i,3,3);x34=x(i,4,3);x35=x(i,5,3);x36=x(i,6,3);

%三条链代表的三个解代入表达式

%T为机械手臂的目标位置矩阵

T=[0.5322 -0.1137 -0.8390 0.0833;-0.4697 -0.8641 -0.1809 0.1890;-0.7044 0.4903 -0.5133 -0.4925;0 0 0 1];

%用每条链的6个角度值求出当前位置矩阵（此处表达式较为复杂，细心编入）

%F为当前位置矩阵与目标位置矩阵的二范数（即当前位置与目标位置的距离）

r111=cos(x11)*[cos(x12+x13)*(cos(x14)*cos(x15)*cos(x16)-sin(x14)*sin(x16))-sin(x12+x13)*sin(x15)*cos(x16)]+sin(x11)*(sin(x14)*cos(x15)*cos(x16)+cos(x14)*sin(x16));

r121=cos(x11)*[-cos(x12+x13)*(cos(x14)*cos(x15)*sin(x16)+sin(x14)*cos(x16))+sin(x12+x13)*sin(x15)*sin(x16)]+sin(x11)*(-sin(x14)*cos(x15)*sin(x16)+cos(x14)*cos(x16));

r131=-cos(x11)*(cos(x12+x13)*cos(x14)*sin(x15)+sin(x12+x13)*cos(x15))-sin(x11)*sin(x14)*sin(x15);

r141=cos(x11)*[0.02032*cos(x12+x13)-0.43307*sin(x12+x13)+0.4318*cos(x12)]-0.14909*sin(x11);

r211=sin(x11)*[cos(x12+x13)*(cos(x14)*cos(x15)*cos(x16)-sin(x14)*sin(x16))-sin(x12+x13)*sin(x15)*cos(x16)]-cos(x11)*(sin(x14)*cos(x15)*cos(x16)+cos(x14)*sin(x16));

r221=sin(x11)*[-cos(x12+x13)*(cos(x14)*cos(x15)*sin(x16)+sin(x14)*cos(x16))+sin(x12+x13)*sin(x15)*sin(x16)]-cos(x11)*(-sin(x14)*cos(x15)*sin(x16)+cos(x14)*cos(x16));

r231=-sin(x11)*(cos(x12+x13)*cos(x14)*sin(x15)+sin(x12+x13)*cos(x15))+cos(x11)*sin(x14)*sin(x15);

r241=sin(x11)*[0.02032*cos(x12+x13)-0.43307*sin(x12+x13)+0.4318*cos(x12)]+0.14909*cos(x11);

r311=-sin(x12+x13)*(cos(x14)*cos(x15)*cos(x16)-sin(x14)*sin(x16))-cos(x12+x13)*sin(x15)*cos(x16);

r321=sin(x12+x13)*(cos(x14)*cos(x15)*sin(x16)+sin(x14)*cos(x16))+cos(x12+x13)*sin(x15)*sin(x16);

r331=sin(x12+x13)*cos(x14)*sin(x15)-cos(x12+x13)*cos(x15);

r341=-0.02032*sin(x12+x13)-0.43307*cos(x12+x13)-0.4318*sin(x12);

r411=0;

r421=0;

r431=0;

r441=1;

A1=[r111 r121 r131 r141;r211 r221 r231 r241;r311 r321 r331 r341;r411 r421 r431 r441];

F(i,1)=norm((A1-T));

r112=cos(x21)*[cos(x22+x23)*(cos(x24)*cos(x25)*cos(x26)-sin(x24)*sin(x26))-sin(x22+x23)*sin(x25)*cos(x26)]+sin(x21)*(sin(x24)*cos(x25)*cos(x26)+cos(x24)*sin(x26));

r122=cos(x21)*[-cos(x22+x23)*(cos(x24)*cos(x25)*sin(x26)+sin(x24)*cos(x26))+sin(x22+x23)*sin(x25)*sin(x26)]+sin(x21)*(-sin(x24)*cos(x25)*sin(x26)+cos(x24)*cos(x26));

r132=-cos(x21)*(cos(x22+x23)*cos(x24)*sin(x25)+sin(x22+x23)*cos(x25))-sin(x21)*sin(x24)*sin(x25);

r142=cos(x21)*[0.02032*cos(x22+x23)-0.43307*sin(x22+x23)+0.4318*cos(x22)]-0.14909*sin(x21);

r212=sin(x21)*[cos(x22+x23)*(cos(x24)*cos(x25)*cos(x26)-sin(x24)*sin(x26))-sin(x22+x23)*sin(x25)*cos(x26)]-cos(x21)*(sin(x24)*cos(x25)*cos(x26)+cos(x24)*sin(x26));

r222=sin(x21)*[-cos(x22+x23)*(cos(x24)*cos(x25)*sin(x26)+sin(x24)*cos(x26))+sin(x22+x23)*sin(x25)*sin(x26)]-cos(x21)*(-sin(x24)*cos(x25)*sin(x26)+cos(x24)*cos(x26));

r232=-sin(x21)*(cos(x22+x23)*cos(x24)*sin(x25)+sin(x22+x23)*cos(x25))+cos(x21)*sin(x24)*sin(x25);

r242=sin(x21)*[0.02032*cos(x22+x23)-0.43307*sin(x22+x23)+0.4318*cos(x22)]+0.14909*cos(x21);

r312=-sin(x22+x23)*(cos(x24)*cos(x25)*cos(x26)-sin(x24)*sin(x26))-cos(x22+x23)*sin(x25)*cos(x26);

r322=sin(x22+x23)*(cos(x24)*cos(x25)*sin(x26)+sin(x24)*cos(x26))+cos(x22+x23)*sin(x25)*sin(x26);

r332=sin(x22+x23)*cos(x24)*sin(x25)-cos(x22+x23)*cos(x25);

r342=-0.02032*sin(x22+x23)-0.43307*cos(x22+x23)-0.4318*sin(x22);

r412=0;

r422=0;

r432=0;

r442=1;

A2=[r112 r122 r132 r142;r212 r222 r232 r242;r312 r322 r332 r342;r412 r422 r432 r442];

F(i,2)=norm((A2-T));

r113=cos(x31)*[cos(x32+x33)*(cos(x34)*cos(x35)*cos(x36)-sin(x34)*sin(x36))-sin(x32+x33)*sin(x35)*cos(x36)]+sin(x31)*(sin(x34)*cos(x35)*cos(x36)+cos(x34)*sin(x36));

r123=cos(x31)*[-cos(x32+x33)*(cos(x34)*cos(x35)*sin(x36)+sin(x34)*cos(x36))+sin(x32+x33)*sin(x35)*sin(x36)]+sin(x31)*(-sin(x34)*cos(x35)*sin(x36)+cos(x34)*cos(x36));

r133= -cos(x31)*(cos(x32+x33)*cos(x34)*sin(x35)+sin(x32+x33)*cos(x35))-sin(x31)*sin(x34)*sin(x35);

r143=cos(x31)*[0.02032*cos(x32+x33)-0.43307*sin(x32+x33)+0.4318*cos(x32)]-0.14909*sin(x31);

r213=sin(x31)*[cos(x32+x33)*(cos(x34)*cos(x35)*cos(x36)-sin(x34)*sin(x36))-sin(x32+x33)*sin(x35)*cos(x36)]-cos(x31)*(sin(x34)*cos(x35)*cos(x36)+cos(x34)*sin(x36));

r223=sin(x31)*[-cos(x32+x33)*(cos(x34)*cos(x35)*sin(x36)+sin(x34)*cos(x36))+sin(x32+x33)*sin(x35)*sin(x36)]-cos(x31)*(-sin(x34)*cos(x35)*sin(x36)+cos(x34)*cos(x36));

r233=-sin(x31)*(cos(x32+x33)*cos(x34)*sin(x35)+sin(x32+x33)*cos(x35))+cos(x31)*sin(x34)*sin(x35);

r243=sin(x31)*[0.02032*cos(x32+x33)-0.43307*sin(x32+x33)+0.4318*cos(x32)]+0.14909*cos(x31);

r313=-sin(x32+x33)*(cos(x34)*cos(x35)*cos(x36)-sin(x34)*sin(x36))-cos(x32+x33)*sin(x35)*cos(x36);

r323=sin(x32+x33)*(cos(x34)*cos(x35)*sin(x36)+sin(x34)*cos(x36))+cos(x32+x33)*sin(x35)*sin(x36);

r333=sin(x32+x33)*cos(x34)*sin(x35)-cos(x32+x33)*cos(x35);

r343=-0.02032*sin(x32+x33)-0.43307*cos(x32+x33)-0.4318*sin(x32);

r413=0;

r423=0;

r433=0;

r443=1;

A3=[r113 r123 r133 r143;r213 r223 r233 r243;r313 r323 r333 r343;r413 r423 r433 r443];

F(i,3)=norm((A3-T));

x11=oldx(i,1,1);x12=oldx(i,2,1);x13=oldx(i,3,1);x14=oldx(i,4,1);x15=oldx(i,5,1);x16=oldx(i,6,1);

x21=oldx(i,1,2);x22=oldx(i,2,2);x23=oldx(i,3,2);x24=oldx(i,4,2);x25=oldx(i,5,2);x26=oldx(i,6,2);

x31=oldx(i,1,3);x32=oldx(i,2,3);x33=oldx(i,3,3);x34=oldx(i,4,3);x35=oldx(i,5,3);x36=oldx(i,6,3);

%三条链代表的三个解代入表达式

%T为机械手臂的目标位置矩阵

T=[0.5322 -0.1137 -0.8390 0.0833;-0.4697 -0.8641 -0.1809 0.1890;-0.7044 0.4903 -0.5133 -0.4925;0 0 0 1];

%用每条链的6个角度值求出当前位置矩阵（此处表达式较为复杂，细心编入）

%F为当前位置矩阵与目标位置矩阵的二范数（即当前位置与目标位置的距离）

r111=cos(x11)*[cos(x12+x13)*(cos(x14)*cos(x15)*cos(x16)-sin(x14)*sin(x16))-sin(x12+x13)*sin(x15)*cos(x16)]+sin(x11)*(sin(x14)*cos(x15)*cos(x16)+cos(x14)*sin(x16));

r121=cos(x11)*[-cos(x12+x13)*(cos(x14)*cos(x15)*sin(x16)+sin(x14)*cos(x16))+sin(x12+x13)*sin(x15)*sin(x16)]+sin(x11)*(-sin(x14)*cos(x15)*sin(x16)+cos(x14)*cos(x16));

r131=-cos(x11)*(cos(x12+x13)*cos(x14)*sin(x15)+sin(x12+x13)*cos(x15))-sin(x11)*sin(x14)*sin(x15);

r141=cos(x11)*[0.02032*cos(x12+x13)-0.43307*sin(x12+x13)+0.4318*cos(x12)]-0.14909*sin(x11);

r211=sin(x11)*[cos(x12+x13)*(cos(x14)*cos(x15)*cos(x16)-sin(x14)*sin(x16))-sin(x12+x13)*sin(x15)*cos(x16)]-cos(x11)*(sin(x14)*cos(x15)*cos(x16)+cos(x14)*sin(x16));

r221=sin(x11)*[-cos(x12+x13)*(cos(x14)*cos(x15)*sin(x16)+sin(x14)*cos(x16))+sin(x12+x13)*sin(x15)*sin(x16)]-cos(x11)*(-sin(x14)*cos(x15)*sin(x16)+cos(x14)*cos(x16));

r231=-sin(x11)*(cos(x12+x13)*cos(x14)*sin(x15)+sin(x12+x13)*cos(x15))+cos(x11)*sin(x14)*sin(x15);

r241=sin(x11)*[0.02032*cos(x12+x13)-0.43307*sin(x12+x13)+0.4318*cos(x12)]+0.14909*cos(x11);

r311=-sin(x12+x13)*(cos(x14)*cos(x15)*cos(x16)-sin(x14)*sin(x16))-cos(x12+x13)*sin(x15)*cos(x16);

r321=sin(x12+x13)*(cos(x14)*cos(x15)*sin(x16)+sin(x14)*cos(x16))+cos(x12+x13)*sin(x15)*sin(x16);

r331=sin(x12+x13)*cos(x14)*sin(x15)-cos(x12+x13)*cos(x15);

r341=-0.02032*sin(x12+x13)-0.43307*cos(x12+x13)-0.4318*sin(x12);

r411=0;

r421=0;

r431=0;

r441=1;

A1old=[r111 r121 r131 r141;r211 r221 r231 r241;r311 r321 r331 r341;r411 r421 r431 r441];

oldF(i,1)=norm((A1old-T));

r112=cos(x21)*[cos(x22+x23)*(cos(x24)*cos(x25)*cos(x26)-sin(x24)*sin(x26))-sin(x22+x23)*sin(x25)*cos(x26)]+sin(x21)*(sin(x24)*cos(x25)*cos(x26)+cos(x24)*sin(x26));

r122=cos(x21)*[-cos(x22+x23)*(cos(x24)*cos(x25)*sin(x26)+sin(x24)*cos(x26))+sin(x22+x23)*sin(x25)*sin(x26)]+sin(x21)*(-sin(x24)*cos(x25)*sin(x26)+cos(x24)*cos(x26));

r132=-cos(x21)*(cos(x22+x23)*cos(x24)*sin(x25)+sin(x22+x23)*cos(x25))-sin(x21)*sin(x24)*sin(x25);

r142=cos(x21)*[0.02032*cos(x22+x23)-0.43307*sin(x22+x23)+0.4318*cos(x22)]-0.14909*sin(x21);

r212=sin(x21)*[cos(x22+x23)*(cos(x24)*cos(x25)*cos(x26)-sin(x24)*sin(x26))-sin(x22+x23)*sin(x25)*cos(x26)]-cos(x21)*(sin(x24)*cos(x25)*cos(x26)+cos(x24)*sin(x26));

r222=sin(x21)*[-cos(x22+x23)*(cos(x24)*cos(x25)*sin(x26)+sin(x24)*cos(x26))+sin(x22+x23)*sin(x25)*sin(x26)]-cos(x21)*(-sin(x24)*cos(x25)*sin(x26)+cos(x24)*cos(x26));

r232=-sin(x21)*(cos(x22+x23)*cos(x24)*sin(x25)+sin(x22+x23)*cos(x25))+cos(x21)*sin(x24)*sin(x25);

r242=sin(x21)*[0.02032*cos(x22+x23)-0.43307*sin(x22+x23)+0.4318*cos(x22)]+0.14909*cos(x21);

r312=-sin(x22+x23)*(cos(x24)*cos(x25)*cos(x26)-sin(x24)*sin(x26))-cos(x22+x23)*sin(x25)*cos(x26);

r322=sin(x22+x23)*(cos(x24)*cos(x25)*sin(x26)+sin(x24)*cos(x26))+cos(x22+x23)*sin(x25)*sin(x26);

r332=sin(x22+x23)*cos(x24)*sin(x25)-cos(x22+x23)*cos(x25);

r342=-0.02032*sin(x22+x23)-0.43307*cos(x22+x23)-0.4318*sin(x22);

r412=0;

r422=0;

r432=0;

r442=1;

A2old=[r112 r122 r132 r142;r212 r222 r232 r242;r312 r322 r332 r342;r412 r422 r432 r442];

oldF(i,2)=norm((A2old-T));

r113=cos(x31)*[cos(x32+x33)*(cos(x34)*cos(x35)*cos(x36)-sin(x34)*sin(x36))-sin(x32+x33)*sin(x35)*cos(x36)]+sin(x31)*(sin(x34)*cos(x35)*cos(x36)+cos(x34)*sin(x36));

r123=cos(x31)*[-cos(x32+x33)*(cos(x34)*cos(x35)*sin(x36)+sin(x34)*cos(x36))+sin(x32+x33)*sin(x35)*sin(x36)]+sin(x31)*(-sin(x34)*cos(x35)*sin(x36)+cos(x34)*cos(x36));

r133= -cos(x31)*(cos(x32+x33)*cos(x34)*sin(x35)+sin(x32+x33)*cos(x35))-sin(x31)*sin(x34)*sin(x35);

r143=cos(x31)*[0.02032*cos(x32+x33)-0.43307*sin(x32+x33)+0.4318*cos(x32)]-0.14909*sin(x31);

r213=sin(x31)*[cos(x32+x33)*(cos(x34)*cos(x35)*cos(x36)-sin(x34)*sin(x36))-sin(x32+x33)*sin(x35)*cos(x36)]-cos(x31)*(sin(x34)*cos(x35)*cos(x36)+cos(x34)*sin(x36));

r223=sin(x31)*[-cos(x32+x33)*(cos(x34)*cos(x35)*sin(x36)+sin(x34)*cos(x36))+sin(x32+x33)*sin(x35)*sin(x36)]-cos(x31)*(-sin(x34)*cos(x35)*sin(x36)+cos(x34)*cos(x36));

r233=-sin(x31)*(cos(x32+x33)*cos(x34)*sin(x35)+sin(x32+x33)*cos(x35))+cos(x31)*sin(x34)*sin(x35);

r243=sin(x31)*[0.02032*cos(x32+x33)-0.43307*sin(x32+x33)+0.4318*cos(x32)]+0.14909*cos(x31);

r313=-sin(x32+x33)*(cos(x34)*cos(x35)*cos(x36)-sin(x34)*sin(x36))-cos(x32+x33)*sin(x35)*cos(x36);

r323=sin(x32+x33)*(cos(x34)*cos(x35)*sin(x36)+sin(x34)*cos(x36))+cos(x32+x33)*sin(x35)*sin(x36);

r333=sin(x32+x33)*cos(x34)*sin(x35)-cos(x32+x33)*cos(x35);

r343=-0.02032*sin(x32+x33)-0.43307*cos(x32+x33)-0.4318*sin(x32);

r413=0;

r423=0;

r433=0;

r443=1;

A3old=[r113 r123 r133 r143;r213 r223 r233 r243;r313 r323 r333 r343;r413 r423 r433 r443];

oldF(i,3)=norm((A3old-T));

%开始计算适应度

fitness(i,1)=F(i,1);

fitness(i,2)=F(i,2);

fitness(i,3)=F(i,3);

oldfitness(i,1)=oldF(i,1);

oldfitness(i,2)=oldF(i,2);

oldfitness(i,3)=oldF(i,3);

%计算适应度结束

end

%开始获得最小值及相应自变量

[Bestf,Indexf]=sort(F,2);

[BestF,IndexF]=sort(Bestf,1);

gBestfi=BestF(1,1);%最小函数值

gBestp=IndexF(1,1);%最好染色体号

gBests=Indexf(gBestp,1);%最好基因链号

gBestfai=fai(gBestp,:);%最优染色体的fai

gBestsita=sita(gBestp,:);%最优染色体的sita

gBestx=x(gBestp,:,gBests);%最优解

gBestC=p(gBestp,:,:);%最优染色体

gBadp=IndexF(Size,3);%最差染色体号

gBads=Indexf(gBadp,3);%最差染色体链号

gBestsfitness=fitness(gBestp,gBests);%最优染色体最好链的适应度

gBestpfitness=fitness(gBestp,:);%最优染色体的适应度

[oldBestf,oldIndexf]=sort(oldF,2);

[oldBestF,oldIndexF]=sort(oldBestf,1);

oldgBestfi=oldBestF(1,1);%最小函数值

oldgBestp=oldIndexF(1,1);%最好染色体号

oldgBests=oldIndexf(oldgBestp,1);%最好基因链号

oldgBestfai=fai(oldgBestp,:);%最优染色体的fai

oldgBestsita=sita(oldgBestp,:);%最优染色体的sita

oldgBestx=oldx(oldgBestp,:,oldgBests);%最优解

oldgBestC=oldp(oldgBestp,:,:);%最优染色体

oldgBadp=oldIndexF(Size,3);%最差染色体号

oldgBads=oldIndexf(oldgBadp,3);%最差染色体链号

oldgBestsfitness=oldfitness(oldgBestp,oldgBests);%最优染色体最好链的适应度

oldgBestpfitness=oldfitness(oldgBests,:);%最优染色体的适应度

%主循环开始

for kg=1:1:G

time(kg)=kg;

%开始更新量子位

for i=1:1:Size

for j=1:1:CodeL

if p(i,j,1)*gBestC(1,j,2)>gBestC(1,j,1)*p(i,j,2)

fai(i,j)=fai(i,j)+0.05*pi;

end

if p(i,j,1)*gBestC(1,j,2)<gBestC(1,j,1)*p(i,j,2)

fai(i,j)=fai(i,j)-0.05*pi;

end

if gBestC(1,j,3)>p(i,j,3)

sita(i,j)=sita(i,j)-0.05*pi;

end

if gBestC(1,j,3)<p(i,j,3)

sita(i,j)=sita(i,j)+0.05*pi;

end

end

end

%结束更新量子位

%开始变异量子位

Pm_rand=rand(Size,CodeL);%生成随机数，与变异概率比较，决定是否变异。

for i=1:1:Size

for j=1:1:CodeL

Pm=ones(1,Size)*pm0;

if Pm(i)>Pm_rand(i,j)&(i==gBestp)

fai(i,j)=0.5*pi-fai(i,j);

sita(i,j)=0.5*pi-sita(i,j);

end

end

end

%结束变异量子位

%代间复制

oldp=p;

oldx=x;

oldfitness=fitness;

%生成染色体开始

p(:,1,1)=cos(fai(:,1)).*sin(sita(:,1));

p(:,1,2)=sin(fai(:,1)).*sin(sita(:,1));

p(:,1,3)=cos(sita(:,1));

p(:,2,1)=cos(fai(:,2)).*sin(sita(:,2));

p(:,2,2)=sin(fai(:,2)).*sin(sita(:,2));

p(:,2,3)=cos(sita(:,2));

p(:,3,1)=cos(fai(:,3)).*sin(sita(:,3));

p(:,3,2)=sin(fai(:,3)).*sin(sita(:,3));

p(:,3,3)=cos(sita(:,3));

p(:,4,1)=cos(fai(:,4)).*sin(sita(:,4));

p(:,4,2)=sin(fai(:,4)).*sin(sita(:,4));

p(:,4,3)=cos(sita(:,4));

p(:,5,1)=cos(fai(:,5)).*sin(sita(:,5));

p(:,5,2)=sin(fai(:,5)).*sin(sita(:,5));

p(:,5,3)=cos(sita(:,5));

p(:,6,1)=cos(fai(:,6)).*sin(sita(:,6));

p(:,6,2)=sin(fai(:,6)).*sin(sita(:,6));

p(:,6,3)=cos(sita(:,6));

%生成染色体结束

%解空间变换开始

x(:,1,:)=0.5*(MaxX(1)*(1+p(:,1,:))+MinX(1)*(1-p(:,1,:)));

x(:,2,:)=0.5*(MaxX(2)*(1+p(:,2,:))+MinX(2)*(1-p(:,2,:)));

x(:,3,:)=0.5*(MaxX(3)*(1+p(:,3,:))+MinX(3)*(1-p(:,3,:)));

x(:,4,:)=0.5*(MaxX(4)*(1+p(:,4,:))+MinX(4)*(1-p(:,4,:)));

x(:,5,:)=0.5*(MaxX(5)*(1+p(:,5,:))+MinX(5)*(1-p(:,5,:)));

x(:,6,:)=0.5*(MaxX(6)*(1+p(:,6,:))+MinX(6)*(1-p(:,6,:)));

%解空间变换结束

%计算函数值开始

for i=1:1:Size

x11=x(i,1,1);x12=x(i,2,1);x13=x(i,3,1);x14=x(i,4,1);x15=x(i,5,1);x16=x(i,6,1);

x21=x(i,1,2);x22=x(i,2,2);x23=x(i,3,2);x24=x(i,4,2);x25=x(i,5,2);x26=x(i,6,2);

x31=x(i,1,3);x32=x(i,2,3);x33=x(i,3,3);x34=x(i,4,3);x35=x(i,5,3);x36=x(i,6,3);

%三条链代表的三个解代入表达式

%T为机械手臂的目标位置矩阵

T=[0.5322 -0.1137 -0.8390 0.0833;-0.4697 -0.8641 -0.1809 0.1890;-0.7044 0.4903 -0.5133 -0.4925;0 0 0 1];

%用每条链的6个角度值求出当前位置矩阵（此处表达式较为复杂，细心编入）

%F为当前位置矩阵与目标位置矩阵的二范数（即当前位置与目标位置的距离）

r111=cos(x11)*[cos(x12+x13)*(cos(x14)*cos(x15)*cos(x16)-sin(x14)*sin(x16))-sin(x12+x13)*sin(x15)*cos(x16)]+sin(x11)*(sin(x14)*cos(x15)*cos(x16)+cos(x14)*sin(x16));

r121=cos(x11)*[-cos(x12+x13)*(cos(x14)*cos(x15)*sin(x16)+sin(x14)*cos(x16))+sin(x12+x13)*sin(x15)*sin(x16)]+sin(x11)*(-sin(x14)*cos(x15)*sin(x16)+cos(x14)*cos(x16));

r131=-cos(x11)*(cos(x12+x13)*cos(x14)*sin(x15)+sin(x12+x13)*cos(x15))-sin(x11)*sin(x14)*sin(x15);

r141=cos(x11)*[0.02032*cos(x12+x13)-0.43307*sin(x12+x13)+0.4318*cos(x12)]-0.14909*sin(x11);

r211=sin(x11)*[cos(x12+x13)*(cos(x14)*cos(x15)*cos(x16)-sin(x14)*sin(x16))-sin(x12+x13)*sin(x15)*cos(x16)]-cos(x11)*(sin(x14)*cos(x15)*cos(x16)+cos(x14)*sin(x16));

r221=sin(x11)*[-cos(x12+x13)*(cos(x14)*cos(x15)*sin(x16)+sin(x14)*cos(x16))+sin(x12+x13)*sin(x15)*sin(x16)]-cos(x11)*(-sin(x14)*cos(x15)*sin(x16)+cos(x14)*cos(x16));

r231=-sin(x11)*(cos(x12+x13)*cos(x14)*sin(x15)+sin(x12+x13)*cos(x15))+cos(x11)*sin(x14)*sin(x15);

r241=sin(x11)*[0.02032*cos(x12+x13)-0.43307*sin(x12+x13)+0.4318*cos(x12)]+0.14909*cos(x11);

r311=-sin(x12+x13)*(cos(x14)*cos(x15)*cos(x16)-sin(x14)*sin(x16))-cos(x12+x13)*sin(x15)*cos(x16);

r321=sin(x12+x13)*(cos(x14)*cos(x15)*sin(x16)+sin(x14)*cos(x16))+cos(x12+x13)*sin(x15)*sin(x16);

r331=sin(x12+x13)*cos(x14)*sin(x15)-cos(x12+x13)*cos(x15);

r341=-0.02032*sin(x12+x13)-0.43307*cos(x12+x13)-0.4318*sin(x12);

r411=0;

r421=0;

r431=0;

r441=1;

A1=[r111 r121 r131 r141;r211 r221 r231 r241;r311 r321 r331 r341;r411 r421 r431 r441];

F(i,1)=norm((A1-T));

r112=cos(x21)*[cos(x22+x23)*(cos(x24)*cos(x25)*cos(x26)-sin(x24)*sin(x26))-sin(x22+x23)*sin(x25)*cos(x26)]+sin(x21)*(sin(x24)*cos(x25)*cos(x26)+cos(x24)*sin(x26));

r122=cos(x21)*[-cos(x22+x23)*(cos(x24)*cos(x25)*sin(x26)+sin(x24)*cos(x26))+sin(x22+x23)*sin(x25)*sin(x26)]+sin(x21)*(-sin(x24)*cos(x25)*sin(x26)+cos(x24)*cos(x26));

r132=-cos(x21)*(cos(x22+x23)*cos(x24)*sin(x25)+sin(x22+x23)*cos(x25))-sin(x21)*sin(x24)*sin(x25);

r142=cos(x21)*[0.02032*cos(x22+x23)-0.43307*sin(x22+x23)+0.4318*cos(x22)]-0.14909*sin(x21);

r212=sin(x21)*[cos(x22+x23)*(cos(x24)*cos(x25)*cos(x26)-sin(x24)*sin(x26))-sin(x22+x23)*sin(x25)*cos(x26)]-cos(x21)*(sin(x24)*cos(x25)*cos(x26)+cos(x24)*sin(x26));

r222=sin(x21)*[-cos(x22+x23)*(cos(x24)*cos(x25)*sin(x26)+sin(x24)*cos(x26))+sin(x22+x23)*sin(x25)*sin(x26)]-cos(x21)*(-sin(x24)*cos(x25)*sin(x26)+cos(x24)*cos(x26));

r232=-sin(x21)*(cos(x22+x23)*cos(x24)*sin(x25)+sin(x22+x23)*cos(x25))+cos(x21)*sin(x24)*sin(x25);

r242=sin(x21)*[0.02032*cos(x22+x23)-0.43307*sin(x22+x23)+0.4318*cos(x22)]+0.14909*cos(x21);

r312=-sin(x22+x23)*(cos(x24)*cos(x25)*cos(x26)-sin(x24)*sin(x26))-cos(x22+x23)*sin(x25)*cos(x26);

r322=sin(x22+x23)*(cos(x24)*cos(x25)*sin(x26)+sin(x24)*cos(x26))+cos(x22+x23)*sin(x25)*sin(x26);

r332=sin(x22+x23)*cos(x24)*sin(x25)-cos(x22+x23)*cos(x25);

r342=-0.02032*sin(x22+x23)-0.43307*cos(x22+x23)-0.4318*sin(x22);

r412=0;

r422=0;

r432=0;

r442=1;

A2=[r112 r122 r132 r142;r212 r222 r232 r242;r312 r322 r332 r342;r412 r422 r432 r442];

F(i,2)=norm((A2-T));

r113=cos(x31)*[cos(x32+x33)*(cos(x34)*cos(x35)*cos(x36)-sin(x34)*sin(x36))-sin(x32+x33)*sin(x35)*cos(x36)]+sin(x31)*(sin(x34)*cos(x35)*cos(x36)+cos(x34)*sin(x36));

r123=cos(x31)*[-cos(x32+x33)*(cos(x34)*cos(x35)*sin(x36)+sin(x34)*cos(x36))+sin(x32+x33)*sin(x35)*sin(x36)]+sin(x31)*(-sin(x34)*cos(x35)*sin(x36)+cos(x34)*cos(x36));

r133= -cos(x31)*(cos(x32+x33)*cos(x34)*sin(x35)+sin(x32+x33)*cos(x35))-sin(x31)*sin(x34)*sin(x35);

r143=cos(x31)*[0.02032*cos(x32+x33)-0.43307*sin(x32+x33)+0.4318*cos(x32)]-0.14909*sin(x31);

r213=sin(x31)*[cos(x32+x33)*(cos(x34)*cos(x35)*cos(x36)-sin(x34)*sin(x36))-sin(x32+x33)*sin(x35)*cos(x36)]-cos(x31)*(sin(x34)*cos(x35)*cos(x36)+cos(x34)*sin(x36));

r223=sin(x31)*[-cos(x32+x33)*(cos(x34)*cos(x35)*sin(x36)+sin(x34)*cos(x36))+sin(x32+x33)*sin(x35)*sin(x36)]-cos(x31)*(-sin(x34)*cos(x35)*sin(x36)+cos(x34)*cos(x36));

r233=-sin(x31)*(cos(x32+x33)*cos(x34)*sin(x35)+sin(x32+x33)*cos(x35))+cos(x31)*sin(x34)*sin(x35);

r243=sin(x31)*[0.02032*cos(x32+x33)-0.43307*sin(x32+x33)+0.4318*cos(x32)]+0.14909*cos(x31);

r313=-sin(x32+x33)*(cos(x34)*cos(x35)*cos(x36)-sin(x34)*sin(x36))-cos(x32+x33)*sin(x35)*cos(x36);

r323=sin(x32+x33)*(cos(x34)*cos(x35)*sin(x36)+sin(x34)*cos(x36))+cos(x32+x33)*sin(x35)*sin(x36);

r333=sin(x32+x33)*cos(x34)*sin(x35)-cos(x32+x33)*cos(x35);

r343=-0.02032*sin(x32+x33)-0.43307*cos(x32+x33)-0.4318*sin(x32);

r413=0;

r423=0;

r433=0;

r443=1;

A3=[r113 r123 r133 r143;r213 r223 r233 r243;r313 r323 r333 r343;r413 r423 r433 r443];

F(i,3)=norm((A3-T));

end

%开始获得最小值及相应自变量

[Bestf,Indexf]=sort(F,2);

[BestF,IndexF]=sort(Bestf,1);

Bestfi=BestF(1,1);%最小函数值

Bestp=IndexF(1,1);%最好染色体号

Bests=Indexf(Bestp,1);%最好基因链号

Bestfai=fai(Bestp,:);%最优染色体的fai

Bestsita=sita(Bestp,:);%最优染色体的sita

Bestx=x(Bestp,:,Bests);%最优解

BestC=p(Bestp,:,:);%最优染色体

Badp=IndexF(Size,3);%最差染色体号

Bads=Indexf(Badp,3);%最差染色体链号

Bestsfitness=fitness(Bestp,Bests);%最优染色体最好链的适应度

Bestpfitness=fitness(Bestp,:);%最优染色体的的适应度

if Bestfi>gBestfi

Bestfi=gBestfi;

fai(Badp,:)=gBestfai(1,:);%因为gBestfai就一条染色体，所以染色体标号为1

sita(Badp,:)=gBestsita(1,:);

p(Badp,:,:)=gBestC(1,:,:);%整条染色体被替换

x(Badp,:,Bads)=gBestx(1,:,1);

Bestpfitness(Badp,:)=gBestpfitness(1,:);

gBestp=Badp;

end

if Bestfi<=gBestfi

gBestfi=Bestfi;

gBestp=Bestp;

gBests=Bests;

gBestfai=Bestfai;

gBestsita=Bestsita;

gBestC=BestC;

gBestx=Bestx;

gBestpfitness=Bestpfitness;

end

%记录最小值及评价值

Bfi(kg)=gBestfi;

%显示当前代数及优化结果

end

%显示最小值

gBestfi

%显示最优解

gBestx

%画图

figure(1);

plot(time,Bfi,'k-.');

xlabel('迭代次数');ylabel('评价函数F的值');
